# Supplementary material for: Conversion of ethanol to 1,3-butadiene over high-performance Mg–ZrOx/MFI nanosheet catalysts via the two-step method
Source: Royal Society of Chemistry journal article supplement (doi:10.1039/d0gc00290a), 2020-01-01
Supplement: d0gc00290a1.pdf [file d0gc00290a1.pdf]

# **Conversion of ethanol to 1,3-butadiene over high-performance Mg-ZrO<sub>x</sub>/MFI nanosheet catalysts via the two-step method**

Xianquan Li,<sup>a,b</sup> Jifeng Pang,<sup>a</sup> Chan Wang,<sup>a</sup> Lin Li,<sup>a</sup> XiaoLi Pan,<sup>a</sup>  
Mingyuan Zheng,<sup>a, c\*</sup> and Tao Zhang<sup>a</sup>

<sup>a</sup> Dalian Institute of Chemical Physics, Chinese Academy of Sciences,  
Dalian 116023, P.R. China. E-mail: [myzheng@dicp.ac.cn](mailto:myzheng@dicp.ac.cn)

<sup>b</sup> University of Chinese Academy of Sciences, Beijing 100049, China.

<sup>c</sup> Dalian National Laboratory for Clean Energy, Dalian 116023, People's  
Republic of China.

## Experimental

### 1.1 Materials

Ethanol (EtOH, 99.7%, Sinopharm), tetraethyl orthosilicate (TEOS, 98%, Aldrich),  $\text{Mg}(\text{NO}_3)_2 \cdot 6\text{H}_2\text{O}$  (99%, Aldrich),  $\text{Cu}(\text{NO}_3)_2$  (99.5%, Aldrich),  $\text{ZrO}(\text{NO}_3)_2$  (99.9%, Aldrich), tetrapropylammonium hydroxide (TPAOH, 2.0 mol/L in  $\text{H}_2\text{O}$ , Aldrich), and magnesium acetylacetonate (99%, Aldrich) were used as received without further purification.

### 1.2 Catalyst Preparation

Synthesis of 20%Cu/SiO<sub>2</sub>: The catalyst was prepared by ammonia evaporation method. In detail, a mixture solution consisting of 5 mL ammonium hydroxide, 100 mL deionized water and 0.75 g  $\text{Cu}(\text{NO}_3)_2$  was filled in a flask and stirred for 3 h at 298 K, and then added with 1 g SiO<sub>2</sub> (size <100 mesh, Qingdao Haiyang Chemical Co.). The mixture was heated to 353 K and further stirred until the pH value reached 7. The precipitation was filtered, dried at 373 K overnight, and calcined at 673 K for 4 h. Before used in reaction for ethanol conversion to acetaldehyde, the catalyst was made into tablets, crushed and sieved to 20-40 mesh without reduction.

### 1.3 Catalytic performance of 20%Cu/SiO<sub>2</sub> for ethanol conversion to acetaldehyde in the first reactor.

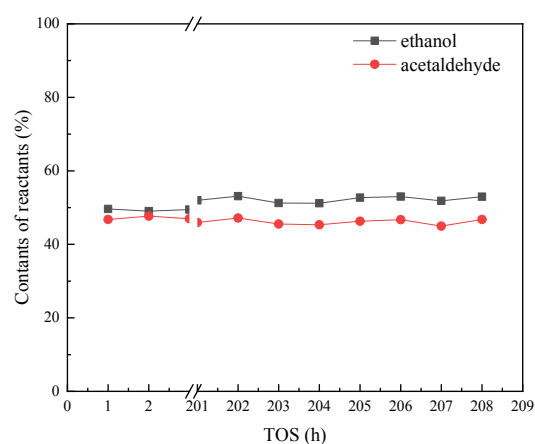

Fig. S1 Contents of ethanol and acetaldehyde in the products of ethanol conversion in the first fixed-bed reactor as a function of reaction time. (The time on stream was started to be counted after the 24 h induction period for catalyst activation)

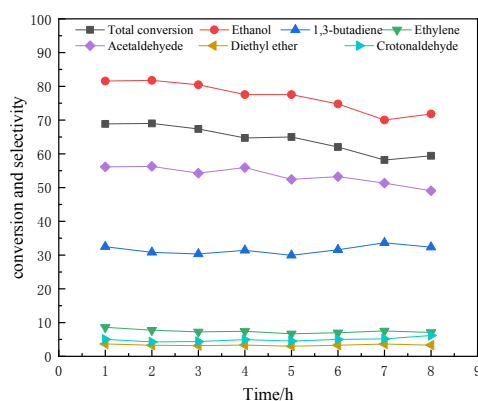

Fig. S2 Catalytic performance of 24Zr/MFI(NS) in ethanol conversion.

Table S1.

Texture property of various MFI(NS) supported Zr catalysts.

| Catalyst       | $S^a_{\text{BET}}$<br>( $\text{m}^2\text{g}^{-1}$ ) | $S^b_{\text{Ext}}$<br>( $\text{m}^2\text{g}^{-1}$ ) | $S^c_{\text{micro}}$<br>( $\text{m}^2\text{g}^{-1}$ ) | $V^c_{\text{micro}}$<br>( $\text{cm}^3\text{g}^{-1}$ ) | $V^b_{\text{meso}}$<br>( $\text{cm}^3\text{g}^{-1}$ ) | Pore <sup>d</sup><br>(nm) |
|----------------|-----------------------------------------------------|-----------------------------------------------------|-------------------------------------------------------|--------------------------------------------------------|-------------------------------------------------------|---------------------------|
| MFI (NS)       | 468                                                 | 268                                                 | 200                                                   | 0.1                                                    | 0.46                                                  | 3.9                       |
| 4%Zr/MFI (NS)  | 445                                                 | 246                                                 | 199                                                   | 0.1                                                    | 0.44                                                  | 3.7                       |
| 16%Zr/MFI (NS) | 357                                                 | 160                                                 | 197                                                   | 0.08                                                   | 0.35                                                  | 3.6                       |

<sup>a</sup> Total surface area is determined by using the BET equation. <sup>b</sup> External surface area and mesopore volume are determined from the adsorption isotherm by the BJH method. <sup>c</sup> Micropore volume is determined by the t-plot method. <sup>d</sup> Pore size distribution is determined from the adsorption isotherm by the BJH method.

Table S2.

Texture property of 16%Zr loaded on different supports.

| Catalyst               | $S^a_{\text{BET}}$<br>( $\text{m}^2\text{g}^{-1}$ ) | $S^b_{\text{Ext}}$<br>( $\text{m}^2\text{g}^{-1}$ ) | $S^c_{\text{micro}}$<br>( $\text{m}^2\text{g}^{-1}$ ) | $V^c_{\text{micro}}$<br>( $\text{cm}^3\text{g}^{-1}$ ) | $V^b_{\text{meso}}$<br>( $\text{cm}^3\text{g}^{-1}$ ) | Pore <sup>d</sup><br>(nm) |
|------------------------|-----------------------------------------------------|-----------------------------------------------------|-------------------------------------------------------|--------------------------------------------------------|-------------------------------------------------------|---------------------------|
| 16%Zr/MFI(NS)          | 357                                                 | 160                                                 | 197                                                   | 0.08                                                   | 0.35                                                  | 3.6                       |
| 16%Zr/MFI(micro)       | 336                                                 | 80                                                  | 256                                                   | 0.21                                                   | 0.1                                                   | 0.8                       |
| 16%Zr/SiO <sub>2</sub> | 393                                                 | 366                                                 | 27                                                    | 0.01                                                   | 0.62                                                  | 6.2                       |

<sup>a</sup> Total surface area is determined using the BET equation. <sup>b</sup> External surface area and mesopore volume are determined from the adsorption isotherm by the BJH method. <sup>c</sup> Micropore volume is determined by the t-plot method. <sup>d</sup> Pore size distribution is determined from the adsorption isotherm by the BJH method.

Table S3.

Texture property of various Mg-Zr/MFI(NS) catalysts.

| Catalyst                           | $S^a_{\text{BET}}$<br>( $\text{m}^2\text{g}^{-1}$ ) | $S^b_{\text{Ext}}$<br>( $\text{m}^2\text{g}^{-1}$ ) | $S^c_{\text{micro}}$<br>( $\text{m}^2\text{g}^{-1}$ ) | $V^c_{\text{micro}}$<br>( $\text{cm}^3\text{g}^{-1}$ ) | $V^b_{\text{meso}}$<br>( $\text{cm}^3\text{g}^{-1}$ ) | Pore <sup>d</sup><br>(nm) |
|------------------------------------|-----------------------------------------------------|-----------------------------------------------------|-------------------------------------------------------|--------------------------------------------------------|-------------------------------------------------------|---------------------------|
| 1.2Mg-16%Zr/MFI(NS)                | 354                                                 | 178                                                 | 176                                                   | 0.09                                                   | 0.36                                                  | 3.8                       |
| 1.2%Mg-16%Zr/MFI(NS)<br>organic Mg | 360                                                 | 180                                                 | 180                                                   | 0.09                                                   | 0.37                                                  | 3.7                       |
| 19.2%Mg-16%Zr/MFI(NS)              | 228                                                 | 71                                                  | 157                                                   | 0.07                                                   | 0.25                                                  | 4.2                       |
| 1.2%Mg/MFI(NS)                     | 446                                                 | 240                                                 | 206                                                   | 0.1                                                    | 0.43                                                  | 3.8                       |
| 19.2%Mg/MFI(NS)                    | 419                                                 | 194                                                 | 225                                                   | 0.11                                                   | 0.4                                                   | 4.1                       |

<sup>a</sup> Total surface area is determined using the BET equation. <sup>b</sup> External surface area and mesopore volume are determined from the adsorption isotherm by the BJH method. <sup>c</sup> Micropore volume is determined by the t-plot method. <sup>d</sup> Pore size distribution is determined from the adsorption isotherm by the BJH method.

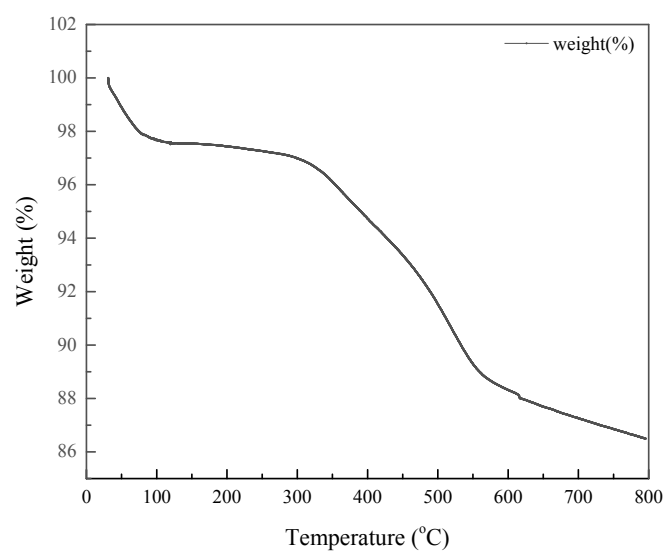

Fig. S3 TG curve of 1.2%Mg-16%Zr/MFI(NS) catalyst after 7 days reaction.

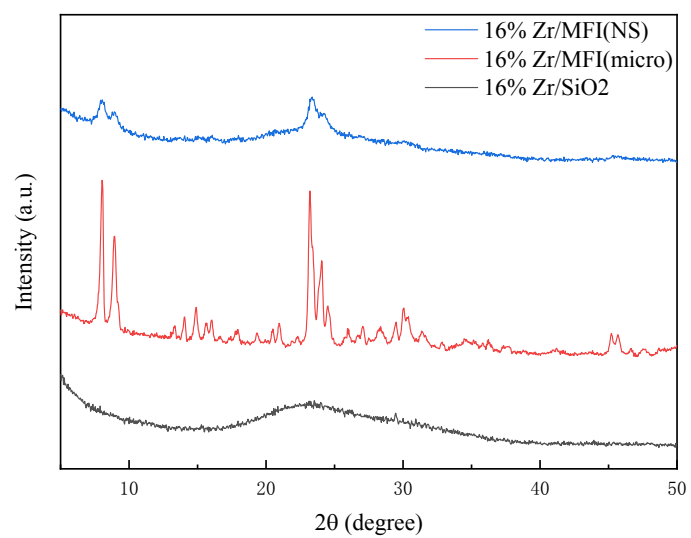

Fig S4. XRD patterns of Zr catalysts loaded on different supports.

Fig. S5 TEM image (a), HAADF-STEM image (b) and EDS mapping (c-g) of 1.2%Mg-16%Zr/MFI(NS).

Fig. S6 SEM images of the fresh (left image) and the spent (right image) 1.2%Mg-16%Zr/MFI(NS).

Fig. S7 HAADF-STEM image (a) and EDS mapping (b-f) of the spent 1.2%Mg-16%Zr/MFI(NS).

Fig. S8 XRD patterns of the spent 1.2%Mg-16%Zr/MFI(NS).
